# Supplementary material
Source: PubMed Central journal article supplement (PMC7653603)
Supplement: ajtr0012-6149-f9.pdf [file ajtr0012-6149-f9.pdf]

## A nomogram for predicting NAFLD

The equation of each variable as follows:

[1] Sex

Female: 1 0.000000

Male: 2 8.106314

[2] Age

14-36 years: 3 0.000000

37-45 years: 4 6.887634

46-93 years: 5 8.813573

[3] ALT

points =  $0.178405561 * ALT + 0$

[4] UA

points =  $0 * UA^3 + 0 * UA^2 + 0.064792951 * UA + 0$

[5] FBG

points =  $0 * FBG^3 + 0 * FBG^2 + 2.447833368 * FBG + -7.343500103$

[6] TC

points =  $4.682007728 * TC + -7.023011592$

[7] TG

points =  $4.776735085 * TG + 0$

[8] HDL

points =  $0 * HDL^3 + 0 * HDL^2 + -18.257037181 * HDL + 73.028148724$

[9] BMI

points =  $0 * BMI^3 + 0 * BMI^2 + 9.090909091 * BMI + -127.272727273$

1-Year incidence =  $-2.5e-07 * total\ points^3 + 0.000108073 * total\ points^2 + -0.015006616 * total\ points + 1.644186245$

2-Year incidence =  $-7e-08 * total\ points^3 + -1.9628e-05 * total\ points^2 + 0.010038587 * total\ points + 0.173116899$

3-Year incidence =  $-7e-08 * total\ points^3 + -2.2799e-05 * total\ points^2 + 0.009401503 * total\ points + 0.319357679$

4-Year incidence =  $-7e-08 * total\ points^3 + -2.5278e-05 * total\ points^2 + 0.008832549 * total\ points + 0.427150119$
